# Supplementary material
Source: Royal Society of Chemistry journal article supplement (doi:10.1039/d6cp01101b)
Supplement: d6cp01101b1.pdf [file d6cp01101b1.pdf]

## Supporting Information

### Synergistic Ni–P Co-doping in Pyrite FeS<sub>2</sub> for Efficient Electrocatalytic Nitrate

### Reduction via a Dissociative Mechanism: A Theoretical Insight

Haitao Sun,<sup>a,#</sup> Jixuan Li,<sup>a,#</sup> Xueshi Song,<sup>a,\*</sup> Yuwei Yan,<sup>a</sup> Jingxiang Zhao<sup>a,\*</sup>

<sup>a</sup> Key Laboratory for Photonic and Electronic Bandgap Materials, Ministry of Education, School of Physics and Electronic Engineering, Harbin Normal University, Harbin, 150025, P. R. China

\* To whom correspondence should be addressed. Email: songxueshihsd@163.com (X. Song), zhaojingxiang@hrbnu.edu.cn (J. Zhao).

# Haitao Sun and Jixuan Li contributed equally to this work.

**Table S1.** Comparison of the  $U_L$  between our Ni-P/FeS<sub>2</sub> system and the recently reported catalysts.

| <b>Catalyst</b>                                    | <b><math>U_L</math> (V)</b> |
|----------------------------------------------------|-----------------------------|
| Ni/Cu (111)                                        | -0.29                       |
| Cu@O <sub>v</sub> -Cr <sub>2</sub> CO <sub>2</sub> | -0.36                       |
| PdCu/C <sub>7</sub> N <sub>6</sub>                 | -0.36                       |
| FeN <sub>4</sub>                                   | -0.38                       |
| Ti/g-CN                                            | -0.39                       |
| OsN <sub>4</sub>                                   | -0.42                       |
| RuN <sub>4</sub>                                   | -0.66                       |

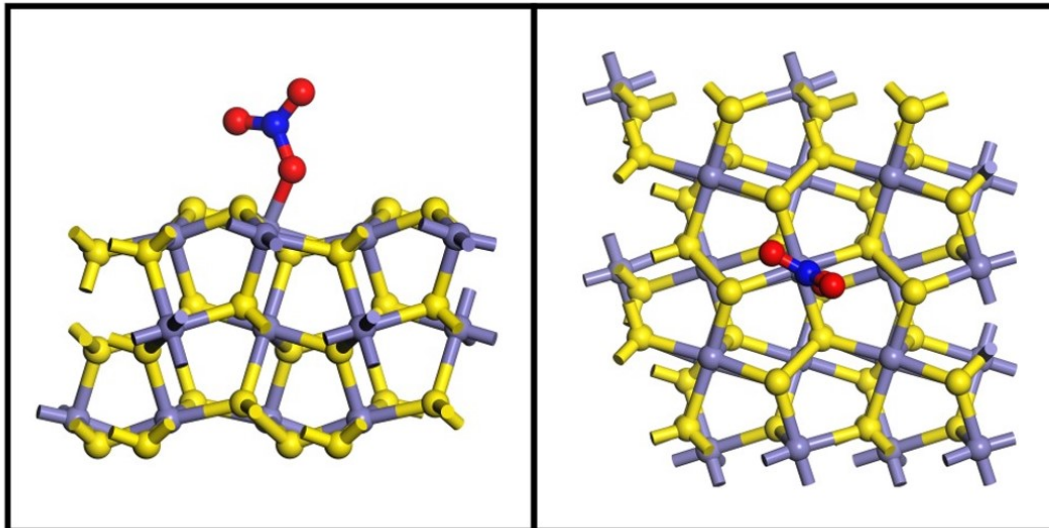

$$\Delta G = 0.76\text{eV}$$

**Fig. S1.** Optimized adsorption configuration and the associated Gibbs free energy change for  $\text{NO}_3^-$  on the pristine  $\text{FeS}_2$  surface.

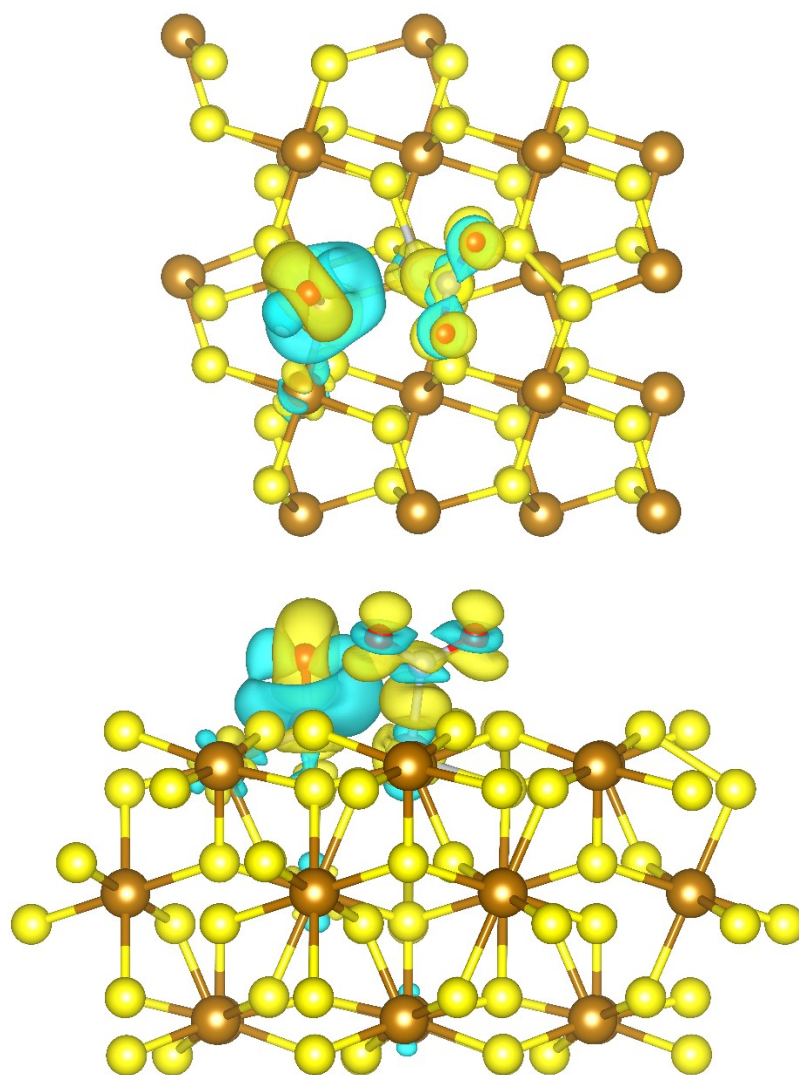

**Fig. S2.** Differential charge density for the adsorption of NO<sub>3</sub><sup>-</sup> species on the Ni-P/FeS<sub>2</sub> catalyst.

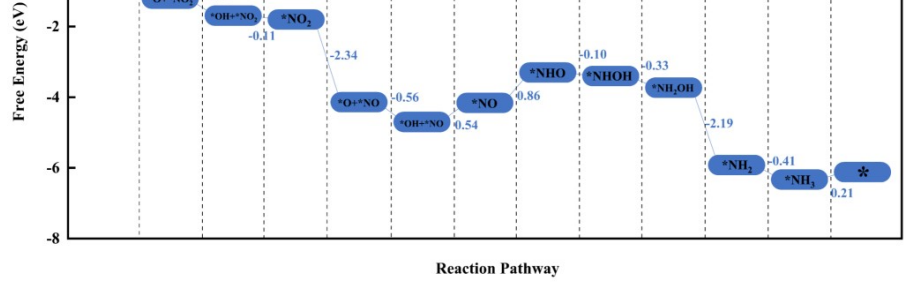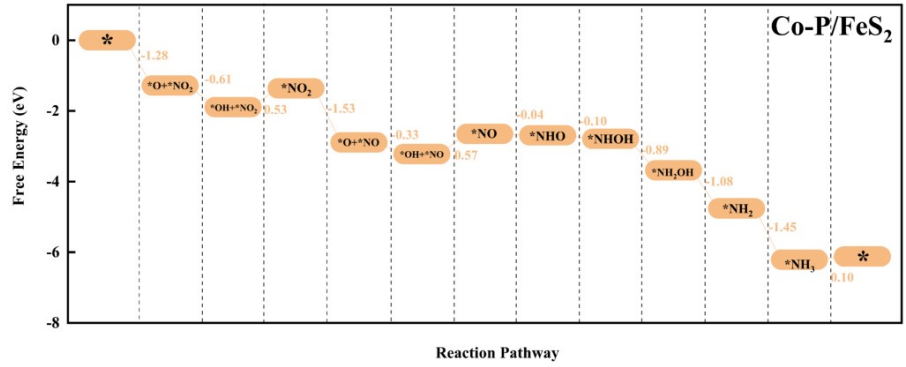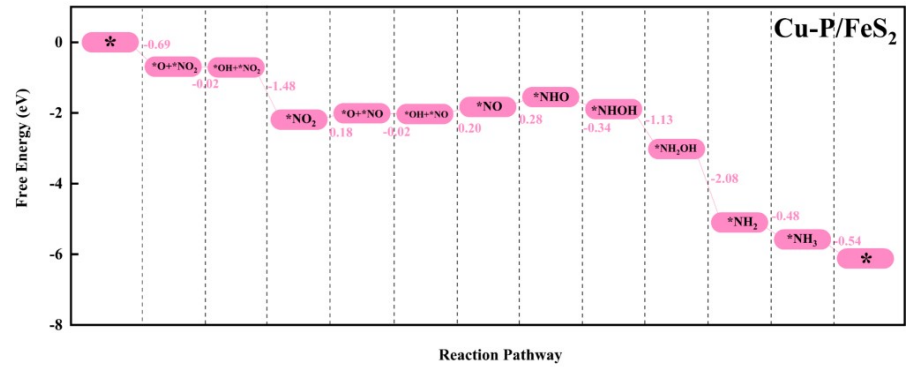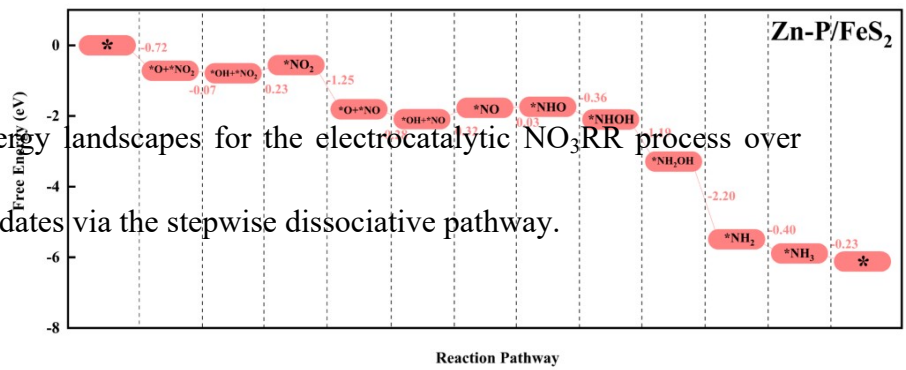

**Fig. S3.** Gibbs free energy landscapes for the electrocatalytic  $\text{NO}_3\text{RR}$  process over various M-P/ $\text{FeS}_2$  candidates via the stepwise dissociative pathway.

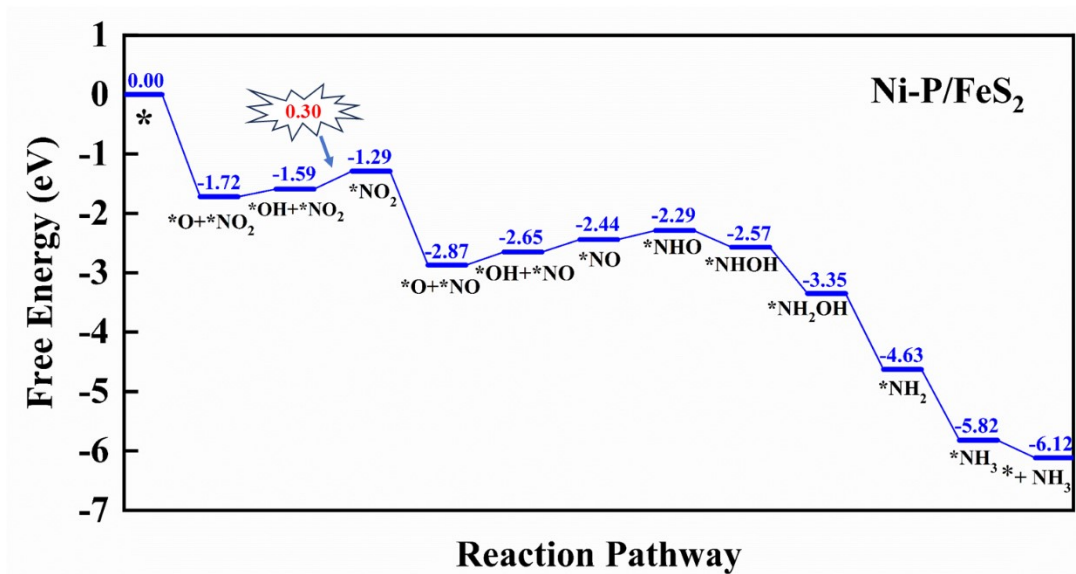

**Fig. S4.** The computed free energy diagram of NO<sub>3</sub>RR on the Ni-P/FeS<sub>2</sub> catalyst by considering the solvent effects using the VASPsol.

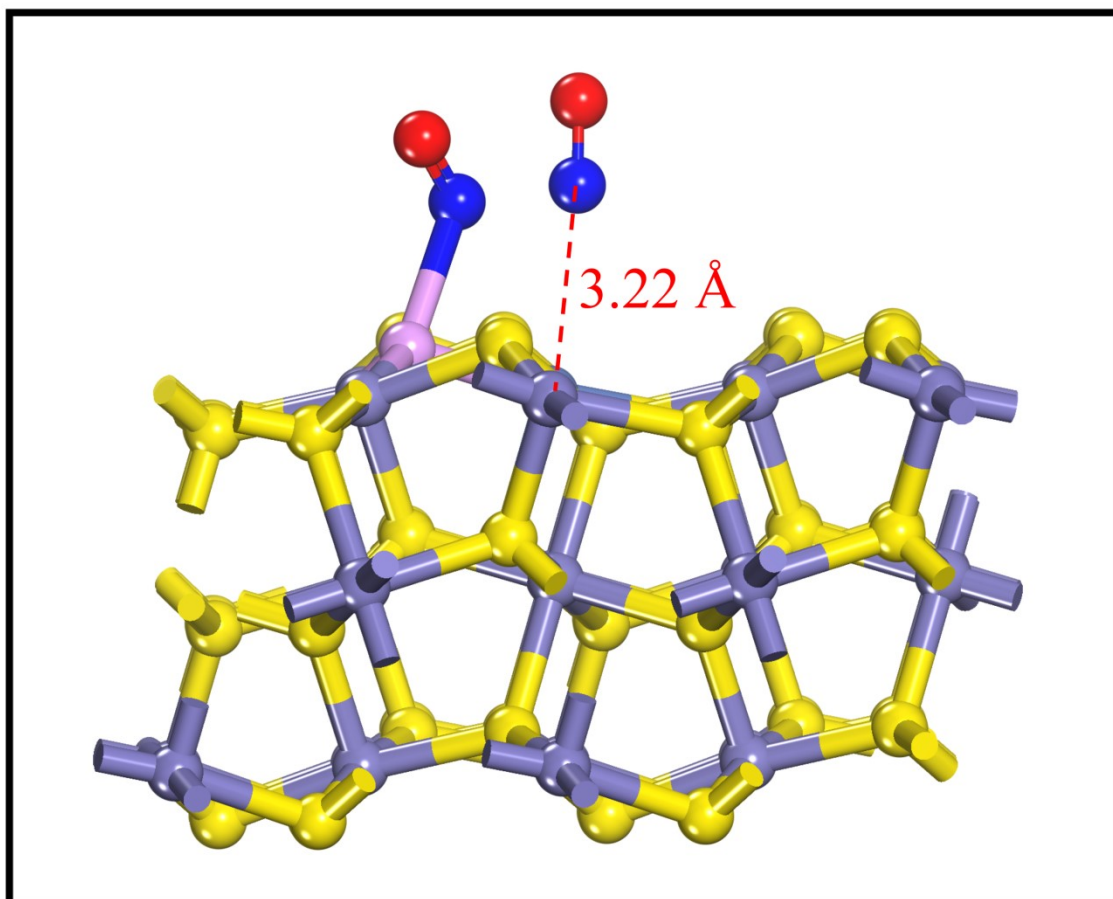

**Fig. S5.** Optimized adsorption configuration for a secondary NO molecule on the NO<sup>\*</sup>-preadsorbed Ni-P/FeS<sub>2</sub> catalyst surface.

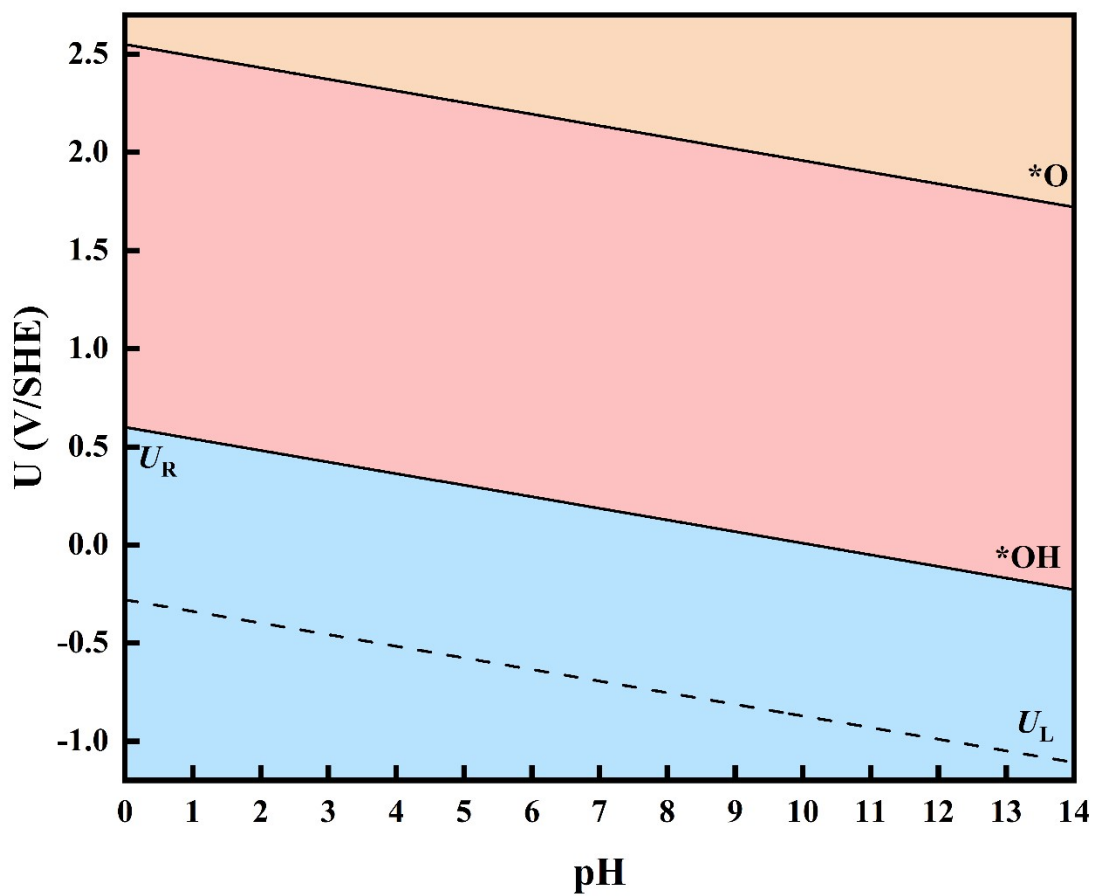

Fig. S6. Pourbaix diagram for the Ni-P/FeS<sub>2</sub> system.
